# Supplementary material for: Three-dimensional porous graphene/polyaniline composites for high-rate electrochemical capacitors
Source: Royal Society of Chemistry journal article supplement (doi:10.1039/c4ta03639e), 2014-01-01
Supplement: c4ta03639e1.pdf [file c4ta03639e1.pdf]

Supporting Information for

**Three-dimensional porous graphene/polyaniline composites  
for high-rate electrochemical capacitors**

**Qinqin Zhou, Yingru Li, Liang Huang, Chun Li, Gaoquan Shi\***

*Department of Chemistry, Tsinghua University, Beijing 100084, People's Republic of  
China, E-mail: gshi@tsinghua.edu.cn*

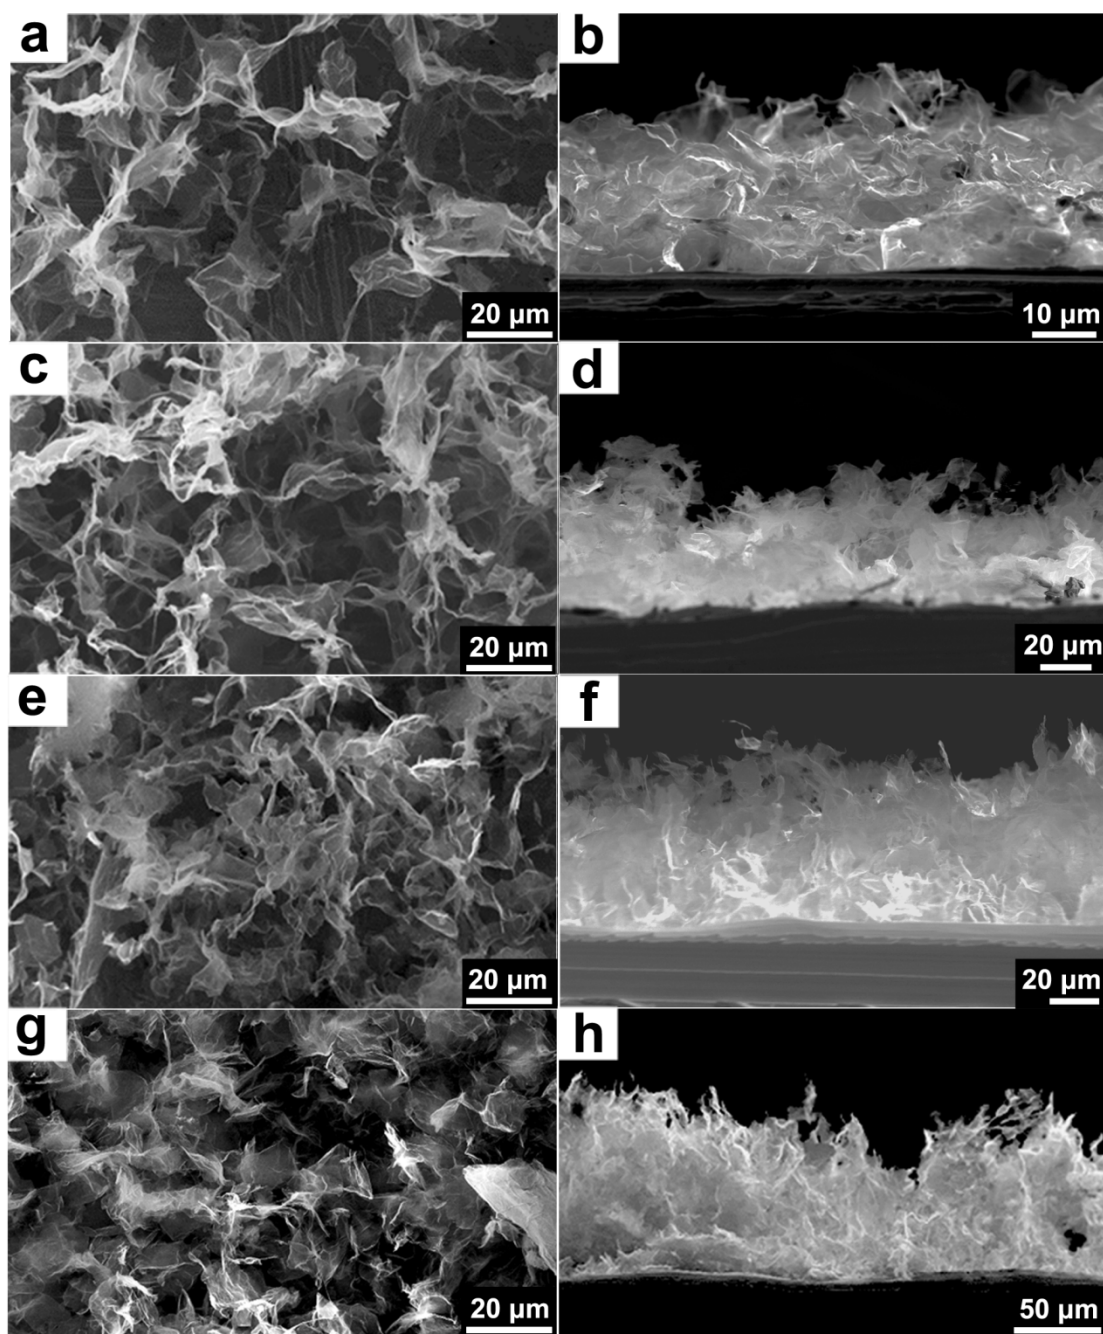

**Fig. S1** (a-h) Top view and cross-section SEM images of GP<sub>1</sub> (a, b), GP<sub>3</sub> (c, d), GP<sub>6</sub> (e, f) and GP<sub>10</sub> (g, h).

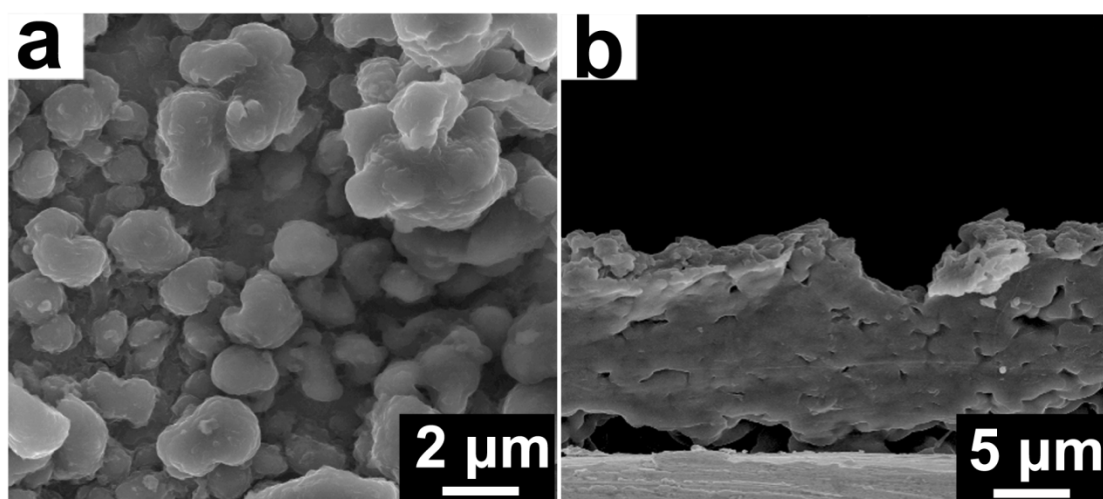

**Fig. S2** (a)Top view and (b)cross-section SEM images of pristine PANI<sub>100</sub>.

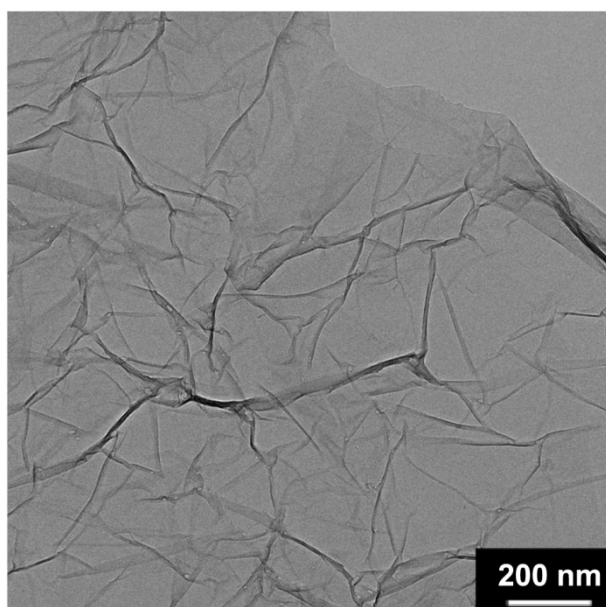

**Fig. S3** TEM images of rGO.

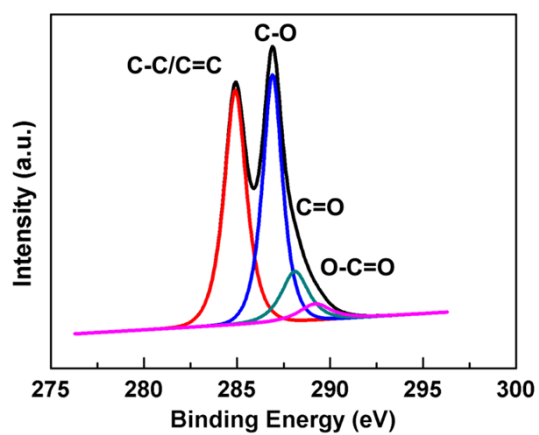

**Fig. S4** C 1s XPS spectrum of GO.

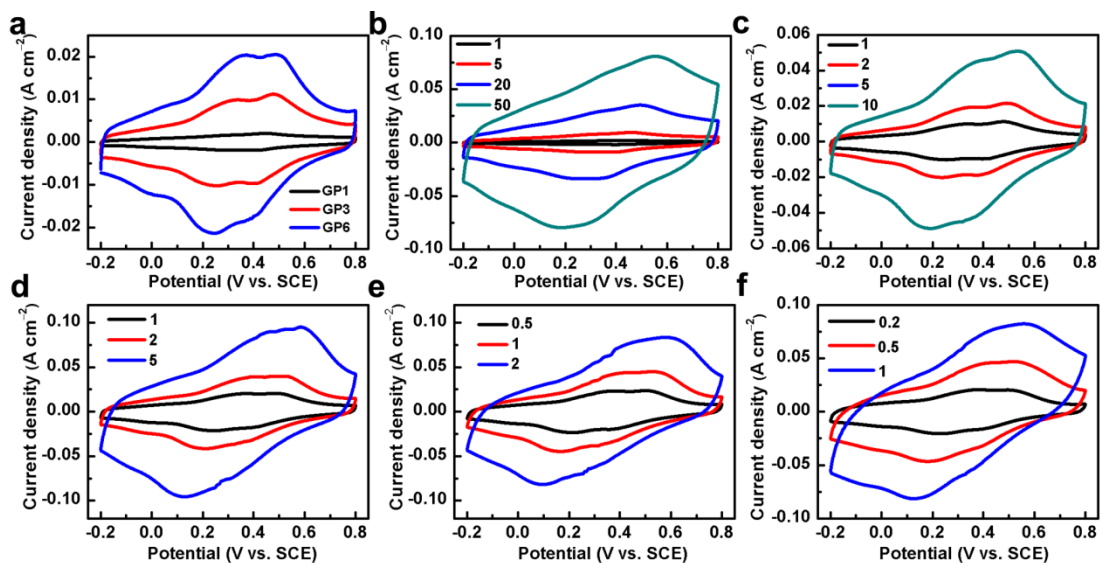

**Fig. S5** (a) CV curves of GP<sub>1</sub>, GP<sub>3</sub> and GP<sub>6</sub> electrodes at a scan rate of 1 V s<sup>-1</sup>; (b-f) CV curves of (b) GP<sub>1</sub>, (c) GP<sub>3</sub>, (d) GP<sub>6</sub>, (e) GP<sub>10</sub> and (f) GP<sub>20</sub> at different scan rates (V s<sup>-1</sup>).

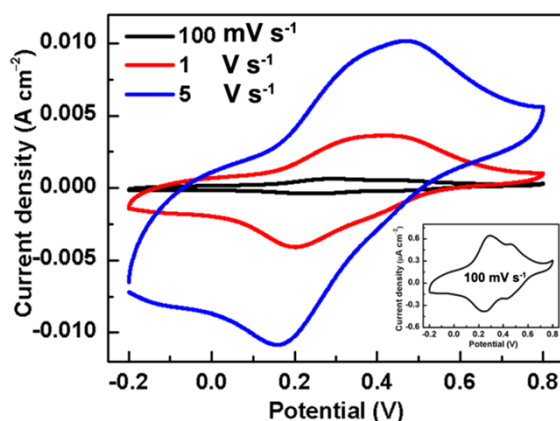

**Fig. S6** (a) CV curves of pure PANI<sub>20</sub> electrode at different scan rates; inset is a magnified CV curve recorded at 100 mV s<sup>-1</sup>.

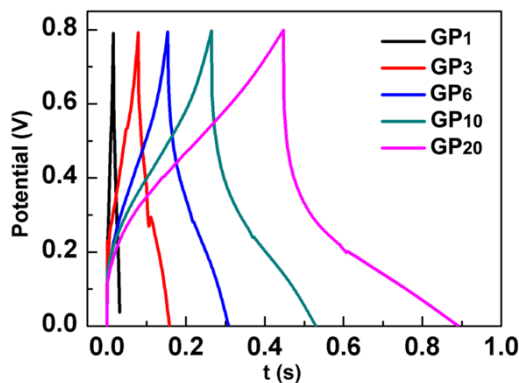

**Fig. S7** Galvanostatic charge-discharge curves of GP<sub>1</sub>, GP<sub>3</sub>, GP<sub>6</sub>, GP<sub>10</sub> and GP<sub>20</sub> electrodes at an  $i_d$  of 50 mA cm<sup>-2</sup>.

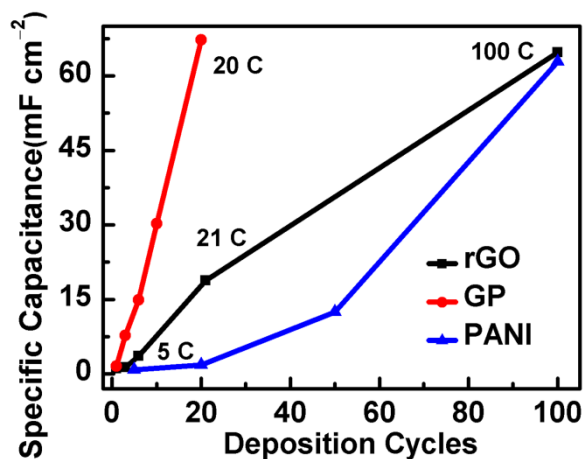

**Fig. S8** Areal specific capacitances of rGO, GP and PANI electrodes with different deposition cycles at a discharge current of  $50 \mu\text{A cm}^{-2}$ .

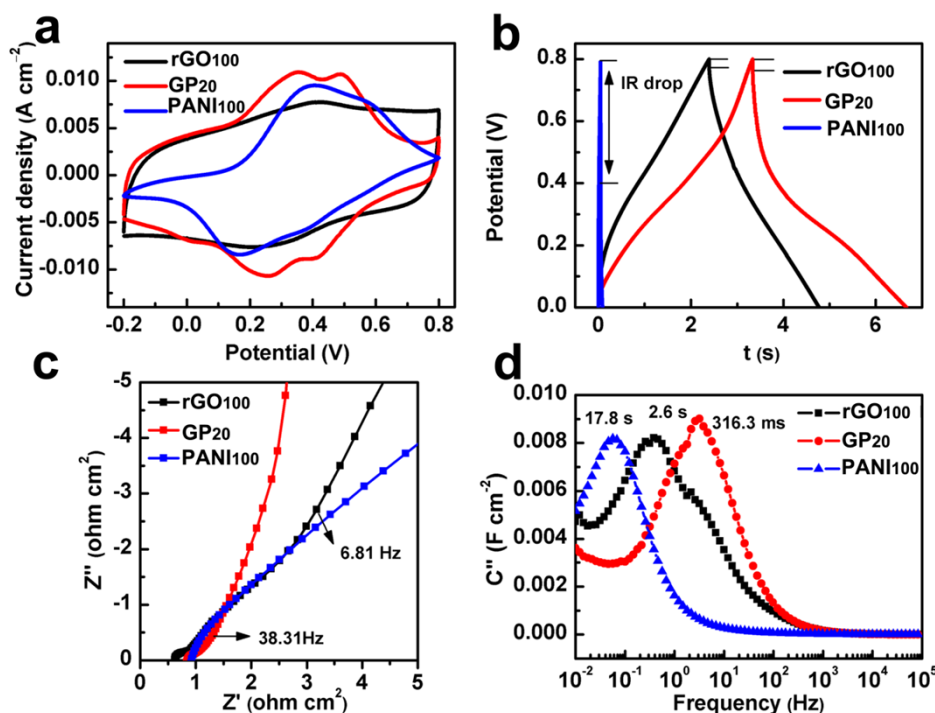

**Fig. S9** (a) CV curves of  $\text{rGO}_{100}$ ,  $\text{GP}_{20}$  and  $\text{PANI}_{100}$  electrodes at a scan rate of  $100 \text{ mV s}^{-1}$ ; (b) Galvanostatic charge–discharge curves of  $\text{rGO}_{100}$ ,  $\text{GP}_{20}$  and  $\text{PANI}_{100}$  electrodes at an  $i_d$  of  $10 \text{ mA cm}^{-2}$ ; (c) The magnified Nyquist plots of  $\text{rGO}_{100}$  and  $\text{GP}_{20}$  electrodes; (d) Bode plots of the imaginary areal specific capacitances versus frequencies of  $\text{rGO}_{100}$ ,  $\text{GP}_{20}$  and  $\text{PANI}_{100}$  electrodes.

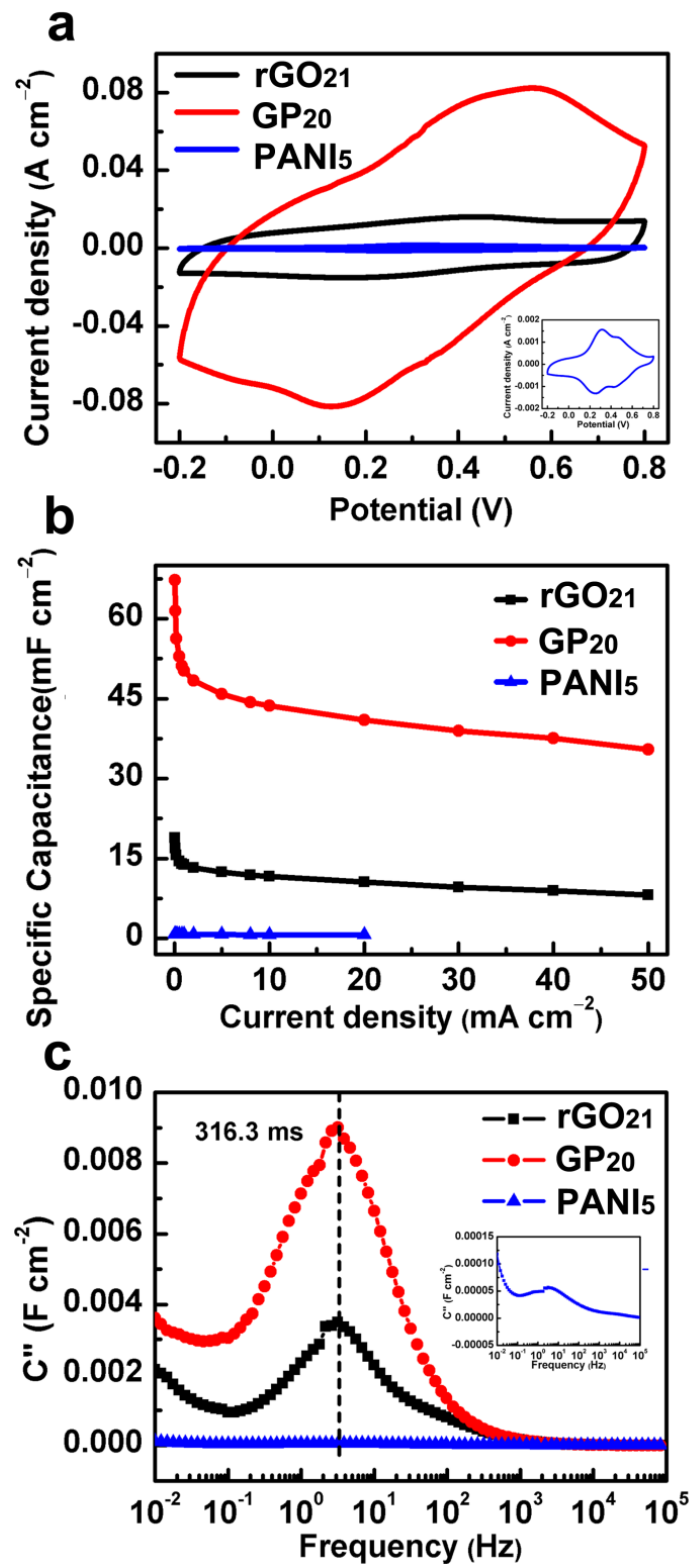

**Fig. S10** (a) CV curves of rGO<sub>21</sub>, GP<sub>20</sub> and PANI<sub>5</sub> electrodes at a scan rate of  $1 \text{ V s}^{-1}$  (inset is the magnified CV of PANI<sub>5</sub>); (b) Areal specific capacitances calculated from the charge-discharge curves of rGO<sub>21</sub>, GP<sub>20</sub> and PANI<sub>5</sub> electrodes at different  $i_d$ s; (c) Bode plots of the imaginary area specific capacitances versus frequencies of rGO<sub>21</sub>, GP<sub>20</sub> and PANI<sub>5</sub> electrodes (inset is the magnified curve of PANI<sub>5</sub>).
